# Supplementary material for: Altered gut microbiome compositions are associated with the severity of asthma
Source: PubMed Central journal article supplement — J Thorac Dis. 2021 Jul;13(7):4322–38. doi: 10.21037/jtd-20-2189 (PMC8339736; doi:10.21037/jtd-20-2189), 2021-07
Supplement: jtd-13-07-4322-dss.pdf [file jtd-13-07-4322-dss.pdf]

## Data Sharing Statement

|                     |                                                                                                                                                    |                                                              |
|---------------------|----------------------------------------------------------------------------------------------------------------------------------------------------|--------------------------------------------------------------|
| <b>Article Info</b> | <a href="http://dx.doi.org/10.21037/jtd-20-2189">http://dx.doi.org/10.21037/jtd-20-2189</a> .                                                      |                                                              |
| <b>Item</b>         | <b>Question</b>                                                                                                                                    | <b>Authors' Response<br/>( place "-" if not applicable )</b> |
| 1                   | Would you like to share data collected for your study to others?                                                                                   | No                                                           |
| 2                   | If not, would you like to share the reason for your decision?                                                                                      | We want to protect the identities of patients in our study.  |
| 3                   | What data in particular will be shared?                                                                                                            | -                                                            |
| 4                   | Any other documents will be share? Such as study protocol, statistical analysis plan, informed consent form, clinical study report, analytic code. | -                                                            |
| 5                   | When will data availability begin?                                                                                                                 | -                                                            |
| 6                   | When will data availability end?                                                                                                                   | -                                                            |
| 7                   | To whom will you share the data?                                                                                                                   | -                                                            |
| 8                   | For what type of analysis or purpose?                                                                                                              | -                                                            |
| 9                   | How or where can the data/documents be obtained?                                                                                                   | -                                                            |
| 10                  | Any other restrictions?                                                                                                                            | -                                                            |
